# Supplementary material for: Growth Performance and Biochemical Composition of Waste-Isolated Microalgae Consortia Grown on Nano-Filtered Pig Slurry and Cheese Whey under Mixotrophic Conditions
Source: MDPI journal article supplement (doi:10.3390/fermentation8100474), 2022-09-22
Supplement: s1 [file s1]

Table S1 Amino acid score of ACs

|                  | AC_1             | AC_2             | AC_4             | AC_5             | AC_6             | AC_7             | AC_8             | AC_9             | AC_11            | AC_12            |
|------------------|------------------|------------------|------------------|------------------|------------------|------------------|------------------|------------------|------------------|------------------|
| tryptophan       | 1.5 ± 0.2        | 1.3 ± 0.0        | 2.0 ± 0.0        | 1.9 ± 0.0        | 1.2 ± 0.2        | 1.8 ± 0.0        | 1.7 ± 0.2        | 1.4 ± 0.2        | 1.0 ± 0.2        | 1.2 ± 0.0        |
| isoleucine       | 1.3 ± 0.1        | 1.2 ± 0.0        | 1.3 ± 0.0        | 1.5 ± 0.1        | 1.1 ± 0.0        | 1.2 ± 0.1        | 1.3 ± 0.0        | 1.2 ± 0.0        | 1.2 ± 0.1        | 1.5 ± 0.1        |
| histidine        | 1.1 ± 0.4        | 0.8 ± 0.1        | 1.1 ± 0.1        | 1.1 ± 0.3        | 2.2 ± 0.0        | 0.9 ± 0.2        | 1.1 ± 0.1        | 1.0 ± 0.0        | 1.0 ± 0.3        | 1.0 ± 0.1        |
| leucine          | 1.3 ± 0.1        | 1.2 ± 0.0        | 1.2 ± 0.0        | 1.3 ± 0.0        | 1.3 ± 0.0        | 1.1 ± 0.0        | 1.4 ± 0.1        | 1.2 ± 0.0        | 1.3 ± 0.0        | 1.2 ± 0.0        |
| lysine           | 1.3 ± 0.0        | 1.0 ± 0.0        | 1.4 ± 0.0        | 1.3 ± 0.0        | 1.9 ± 0.0        | 0.9 ± 0.0        | 0.9 ± 0.0        | 1.0 ± 0.0        | 1.0 ± 0.0        | 0.8 ± 0.0        |
| threonine        | 2.0 ± 0.1        | 1.8 ± 0.0        | 2.0 ± 0.0        | 2.2 ± 0.1        | 1.7 ± 0.1        | 1.8 ± 0.1        | 2.1 ± 0.1        | 1.9 ± 0.1        | 1.8 ± 0.0        | 2.0 ± 0.1        |
| valine           | 0.9 ± 0.1        | <b>0.7 ± 0.1</b> | <b>0.9 ± 0.0</b> | <b>1.0 ± 0.1</b> | <b>0.7 ± 0.1</b> | <b>0.7 ± 0.0</b> | <b>0.8 ± 0.1</b> | 0.8 ± 0.1        | 0.7 ± 0.0        | 0.8 ± 0.0        |
| SAA <sup>a</sup> | <b>0.8 ± 0.0</b> | 0.8 ± 0.0        | 1.1 ± 0.0        | <b>1.0 ± 0.0</b> | <b>0.7 ± 0.0</b> | 1.0 ± 0.0        | <b>0.8 ± 0.0</b> | <b>0.7 ± 0.0</b> | <b>0.6 ± 0.0</b> | <b>0.6 ± 0.0</b> |
| AAA <sup>b</sup> | 1.6 ± 0.1        | 1.4 ± 0.0        | 1.5 ± 0.0        | 1.6 ± 0.0        | 1.5 ± 0.0        | 1.3 ± 0.0        | 1.5 ± 0.0        | 1.4 ± 0.1        | 1.4 ± 0.0        | 1.5 ± 0.0        |

<sup>a</sup>SAA: methionine+cysteine.<sup>b</sup>AAA: Phenylalanine + Tyrosine

Table S2 Amino acids of ACs

|               | AC_1            | AC_2       | AC_4       | AC_5       | AC_6       | AC_7       | AC_8       | AC_9       | AC_11      | AC_12      |
|---------------|-----------------|------------|------------|------------|------------|------------|------------|------------|------------|------------|
|               | % crude protein |            |            |            |            |            |            |            |            |            |
| cysteine      | 0.3 ± 0.0       | 0.2 ± 0.0  | 0.5 ± 0.1  | 0.4 ± 0.0  | 0.2 ± 0.0  | 0.4 ± 0.1  | 0.3 ± 0.0  | 0.2 ± 0.0  | 0.2 ± 0.0  | 0.3 ± 0.1  |
| methionine    | 1.5 ± 0.1       | 1.6 ± 0.0  | 1.9 ± 0.0  | 1.7 ± 0.0  | 1.4 ± 0.1  | 1.7 ± 0.0  | 1.6 ± 0.0  | 1.4 ± 0.1  | 1.2 ± 0.1  | 1.0 ± 0.0  |
| tryptophan    | 1.0 ± 0.1       | 0.8 ± 0.0  | 1.3 ± 0.0  | 1.3 ± 0.0  | 0.8 ± 0.1  | 1.2 ± 0.0  | 1.1 ± 0.1  | 0.9 ± 0.1  | 0.7 ± 0.1  | 0.8 ± 0.0  |
| aspartic      | 14.2 ± 0.6      | 15.5 ± 0.1 | 14.4 ± 0.2 | 10.0 ± 0.4 | 12.0 ± 0.3 | 13.3 ± 0.2 | 14.1 ± 0.4 | 16.9 ± 0.2 | 16.8 ± 0.4 | 19.2 ± 0.5 |
| glutamic      | 16.3 ± 0.5      | 15.5 ± 0.2 | 14.9 ± 0.0 | 17.7 ± 0.2 | 15.7 ± 0.4 | 21.6 ± 0.2 | 15.3 ± 0.3 | 15.2 ± 0.1 | 15.5 ± 0.2 | 16.3 ± 0.2 |
| alanine       | 2.4 ± 0.3       | 4.3 ± 0.2  | 2.8 ± 0.1  | 2.5 ± 0.3  | 2.3 ± 0.3  | 6.5 ± 0.1  | 2.1 ± 0.0  | 4.2 ± 0.0  | 5.5 ± 0.3  | 2.9 ± 0.2  |
| arginine      | 17.6 ± 2.1      | 20.6 ± 0.3 | 18.2 ± 0.1 | 18.5 ± 0.8 | 18.1 ± 0.9 | 17.3 ± 0.3 | 20.6 ± 1.7 | 19.0 ± 0.9 | 17.4 ± 0.5 | 19.4 ± 0.2 |
| glycine       | 5.5 ± 0.3       | 5.8 ± 0.0  | 5.4 ± 0.2  | 5.6 ± 0.2  | 6.2 ± 0.2  | 4.6 ± 0.1  | 6.0 ± 0.3  | 5.7 ± 0.3  | 6.9 ± 0.2  | 4.8 ± 0.1  |
| isoleucine    | 3.9 ± 0.3       | 3.6 ± 0.1  | 3.9 ± 0.1  | 4.6 ± 0.3  | 3.3 ± 0.0  | 3.7 ± 0.2  | 4.0 ± 0.0  | 3.7 ± 0.0  | 3.5 ± 0.3  | 4.4 ± 0.3  |
| histidine     | 1.7 ± 0.6       | 1.2 ± 0.1  | 1.6 ± 0.1  | 1.6 ± 0.5  | 3.3 ± 0.0  | 1.4 ± 0.3  | 1.6 ± 0.2  | 1.5 ± 0.0  | 1.6 ± 0.4  | 1.5 ± 0.2  |
| leucine       | 7.8 ± 0.3       | 7.3 ± 0.0  | 7.4 ± 0.0  | 8.0 ± 0.2  | 7.6 ± 0.0  | 6.3 ± 0.1  | 8.0 ± 0.3  | 7.2 ± 0.2  | 7.5 ± 0.2  | 7.0 ± 0.1  |
| lysine        | 5.9 ± 0.1       | 4.3 ± 0.1  | 6.2 ± 0.1  | 6.0 ± 0.0  | 8.4 ± 0.0  | 4.2 ± 0.0  | 4.0 ± 0.0  | 4.7 ± 0.1  | 4.3 ± 0.0  | 3.8 ± 0.0  |
| proline       | 3.1 ± 0.1       | 2.2 ± 0.1  | 2.7 ± 1.0  | 2.0 ± 0.3  | 4.4 ± 0.7  | 1.6 ± 0.2  | 2.7 ± 0.6  | 1.5 ± 0.4  | 2.2 ± 0.1  | 0.4 ± 0.0  |
| serine        | 4.8 ± 0.1       | 4.9 ± 0.0  | 4.8 ± 0.0  | 5.0 ± 0.1  | 5.2 ± 0.0  | 4.2 ± 0.0  | 4.9 ± 0.1  | 4.8 ± 0.1  | 4.8 ± 0.0  | 4.5 ± 0.0  |
| tyrosine      | 2.7 ± 0.1       | 2.2 ± 0.1  | 2.5 ± 0.0  | 2.4 ± 0.0  | 2.6 ± 0.0  | 2.1 ± 0.0  | 2.2 ± 0.0  | 2.4 ± 0.0  | 2.3 ± 0.1  | 2.4 ± 0.1  |
| threonine     | 4.7 ± 0.3       | 4.1 ± 0.1  | 4.7 ± 0.1  | 5.2 ± 0.3  | 3.9 ± 0.2  | 4.1 ± 0.3  | 4.8 ± 0.2  | 4.4 ± 0.2  | 4.0 ± 0.0  | 4.6 ± 0.3  |
| valine        | 3.3 ± 0.3       | 2.8 ± 0.3  | 3.5 ± 0.1  | 3.9 ± 0.2  | 2.8 ± 0.2  | 2.7 ± 0.0  | 3.3 ± 0.2  | 3.0 ± 0.2  | 2.6 ± 0.0  | 3.3 ± 0.1  |
| phenylalanine | 3.5 ± 0.2       | 3.1 ± 0.1  | 3.3 ± 0.1  | 3.7 ± 0.1  | 3.1 ± 0.1  | 2.9 ± 0.0  | 3.5 ± 0.0  | 3.0 ± 0.2  | 3.0 ± 0.1  | 3.3 ± 0.1  |
